# Supplementary material for: Chemical synthesis of Nd2Fe14B hard phase magnetic nanoparticles with an enhanced coercivity value: effect of CaH2 amount on the magnetic properties
Source: Royal Society of Chemistry journal article supplement (doi:10.1039/c6nj02436j), 2016-01-01
Supplement: c6nj02436j1.pdf [file c6nj02436j1.pdf]

NJC

## **Supplementary Materials**

### **Chemical Synthesis of Nd<sub>2</sub>Fe<sub>14</sub>B Hard Phase Magnetic**

### **Nanoparticles with Enhanced Coercivity Value; Effect of CaH<sub>2</sub>**

### **Amount on the Magnetic Properties**

Ji Hun Jung,<sup>a</sup> Hao Xuan Ma,<sup>a</sup> Doyun Kim,<sup>a</sup> Chang Woo Kim,<sup>a</sup> In Ho Kim,<sup>a</sup> Jae Woo Ahn,<sup>a</sup>

Dong Soo Kim<sup>b</sup> and Young Soo Kang\*<sup>a</sup>

<sup>a</sup> Department of Chemistry, Sogang University, Seoul 121-742, Republic of Korea. E-mail:

yskang@sogang.ac.kr; Fax: +82 2701 0967; Tel: +82 2701 6379

<sup>b</sup> Korea Institute of Material Science, Changwon, Gyeongnam 642-831, Republic of Korea.

E-mail: dskim@kims.re.kr

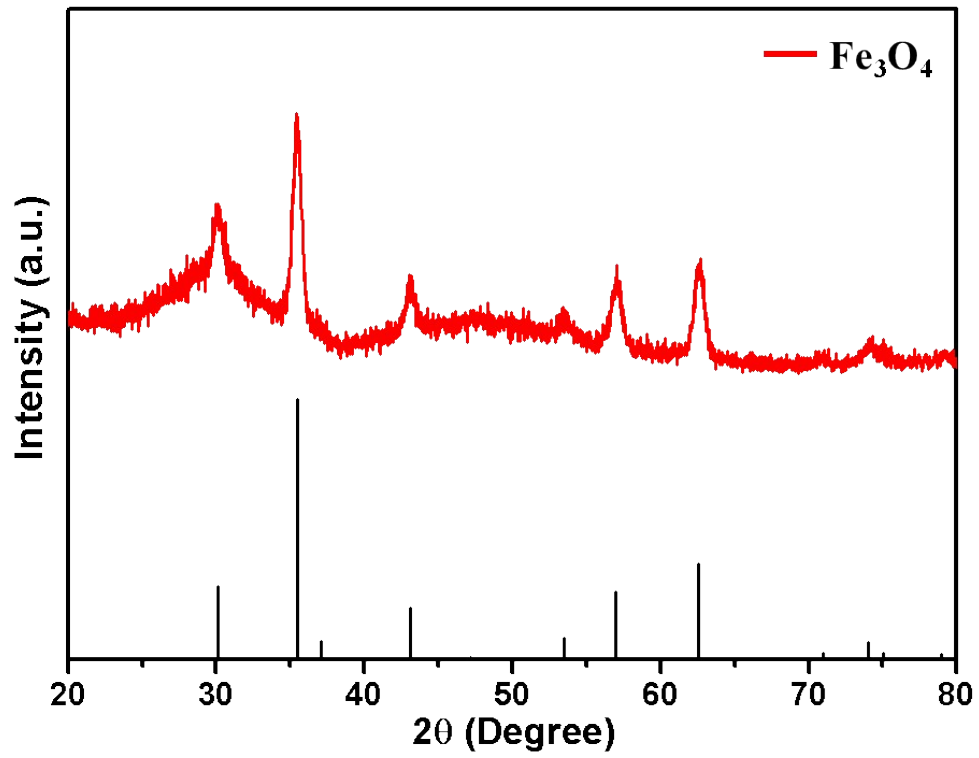

FIG. S1. X-ray diffraction pattern of the synthesized Nd-Fe-B oxide powders. Standard peak positions for  $\text{Fe}_3\text{O}_4$  (JCPDS# 65-3107) are indicated at the bottom.

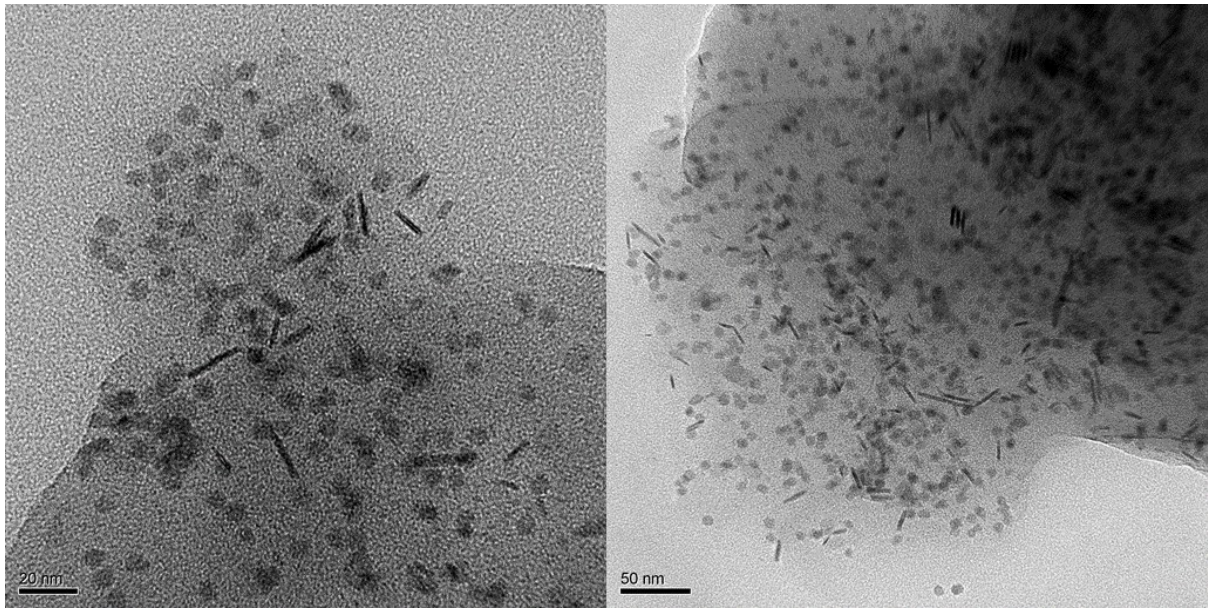

FIG. S2. TEM images of Nd-Fe-B oxide powders. The  $\text{Fe}_3\text{O}_4$  nanoparticles (round and rod-like shape) are surrounded by the amorphous phase of neodymium and boron elements.

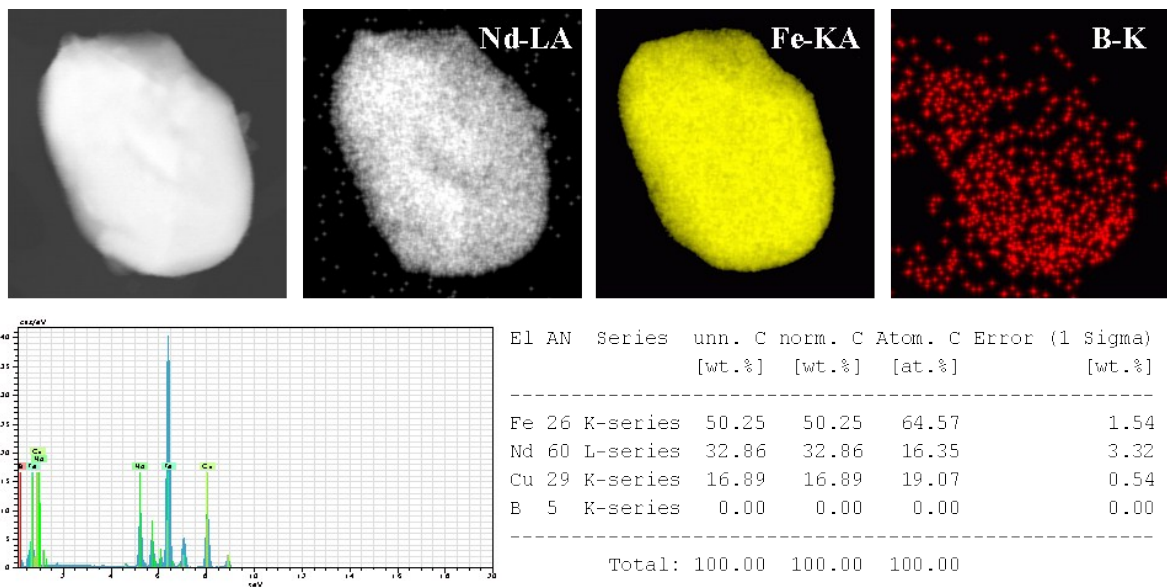

FIG. S3. EDS elemental mapping and EDS spectrum analysis of  $\text{Nd}_2\text{Fe}_{14}\text{B}$  magnetic nanoparticle after annealing process at  $900^\circ\text{C}$  for 2 h with  $\text{CaH}_2$  under high purity Ar gas.

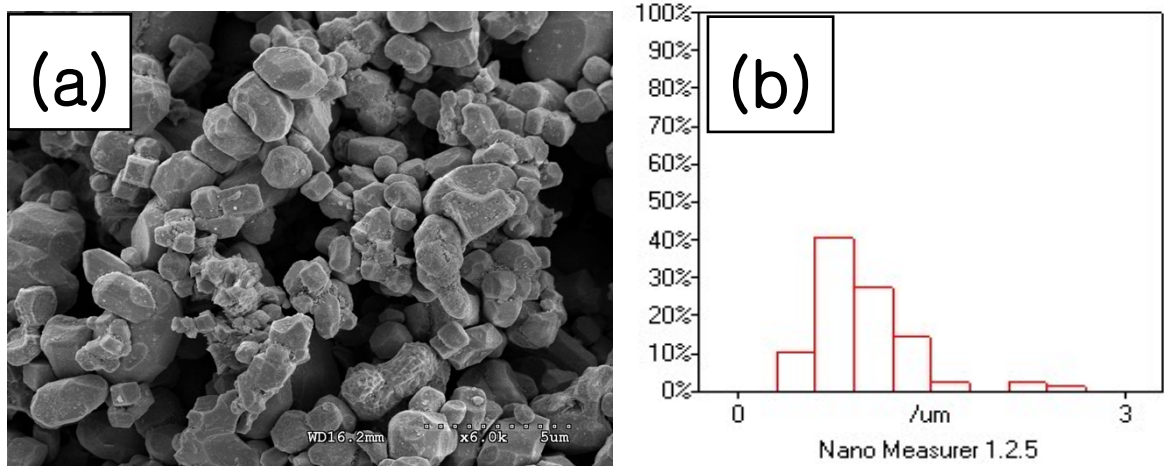

FIG. S4. (a) SEM images of  $\text{Nd}_2\text{Fe}_{14}\text{B}$  particles which was synthesized by the weight ratio of 1:1:0. (b) The size distribution of the  $\text{Nd}_2\text{Fe}_{14}\text{B}$  particles.
